# Supplementary material for: An impact assessment of insecticides application on the non-targeted mosquito Aedes albopictus (Skuse) in Punjab rice fields, Pakistan
Source: PeerJ. 2022 Jul 11;10:e13697. doi: 10.7717/peerj.13697 (PMC9281598; doi:10.7717/peerj.13697)
Supplement: Supplemental Information 1 — Insecticidal bioassays data and life history parameters. [file peerj-10-13697-s001.xlsx]

## Sheet: Sheet1
				locality
1	Phorate	thimet		Lahore
2	Triazophos			okara
	carbosulfon			gujranwala
4	cartep hydrochloride			MBD
5	gammacyhalothrin			khushab
6	chlorantraniliprole			jhang
7	fipronil			Multan
8	flonicamid
9	monomehypo
10	Clothianidin
			Lab			Lahore				okara				gujranwala				MBD				khushab				Multan				Jhng
		triazophos
		0.0625	75	13		0.5	75	5		12.5	75	3		12.5	75	2						12.5	75	7			6.25	75	2			6.25	75	6
		0.125	75	19		1	75	9		25	75	9		25	75	7		12.5	75	10		25	75	12			12.5	75	5			12.5	75	10
		0.25	75	46		2	75	27		50	75	30		50	75	16		25	75	20		50	75	19			25	75	16			25	75	20
		0.5	75	60		4	75	42		100	75	47		100	75	36		50	75	40		100	75	37			50	75	40			50	75	44
		1	75	68		8	75	57		200	75	59		200	75	55		100	75	55		200	75	59			100	75	63			100	75	66
		2	75	74		16	75	70		400	75	69		400	75	72		200	75	61		400	75	74			200	75	74			200	75	74
		0	75	4		0	75	2		0	75	3		0	75	1		0	75	1		0	75	1			0	75	1			0	75	1
		Carbofuron
		0.125	75	22		3	75	4		31.25	75	11		31.25	75	7		31.25	75	6							31.25	75	10		31.25	75	5
		0.25	75	40		6.25	75	8		62.5	75	25		62.5	75	11		62.5	75	9		31.25	75	11			62.5	75	17		62.5	75	13
		0.5	75	61		12.5	75	20		125	75	38		125	75	24		125	75	18		62.5	75	17			125	75	30		125	75	25
		1	75	70		25	75	55		250	75	58		250	75	46		250	75	45		125	75	33			250	75	59		250	75	54
		2	75	75		50	75	64		500	75	65		500	75	60		500	75	60		250	75	52			500	75	65		500	75	65
		0	75	1		100	75	74		1000	75	71		1000	75	65		1000	75	70		500	75	65			1000	75	72		1000	75	74
						0	75	1		0	75	1		0	75	1		0	75	0		0	75	2			0	75	0		0	75	0
		gamma
		0.1	75	15		0.5	75	6		1.5	75	3		10	75	10		3.13	75	5											3	75	3
		0.2	75	30		1	75	10		3	75	5		19	75	14		6.25	75	9			3	75	12		3	75	2		6.25	75	5
		0.4	75	63		2	75	20		6	75	9		37.5	75	35		12.5	75	17			6.25	75	20		6.25	75	9		12.5	75	11
		0.8	75	70		4	75	36		12	75	30		75	75	50		25	75	36			12.5	75	38		12.5	75	24		25	75	27
		1.6	75	74		8	75	65		24	75	50		150	75	58		50	75	50			25	75	60		25	75	51		50	75	50
		0	75	1		16	75	73		48	75	64		300	75	70		100	75	61			50	75	70		50	75	63		100	75	65
						0	75	1		0	75	3		0	75	2		0	75	3			0	75	1		0	75	1		0	75	1
			Flonicamid
		0.13	75	10		1	75	3		3	75	6		3	75	8		4	75	5			4	75	2		4	75	5		4	75	4
		0.25	75	19		2	75	5		6	75	8		6	75	15		8	75	10			8	75	3		8	75	8		8	75	9
		0.5	75	50		4	75	15		12	75	20		12	75	22		16	75	22			16	75	9		16	75	13		16	75	27
		1	75	63		8	75	42		24	75	41		24	75	45		32	75	50			32	75	15		32	75	21		32	75	46
		2	75	72		16	75	58		48	75	55		48	75	53		64	75	58			64	75	45		64	75	40		64	75	54
		4	75	74		32	75	70		96	75	65		96	75	59		128	75	65			128	75	55		128	75	50		128	75	59
		0	75	1		0	75	1		0	75	1		0	75	3		0	75	1			256	75	62		256	75	57		0	75	1
																							0	75	2		0	75	2
		Chlorantra
		0.22	75	11		0.5	75	7		2	75	3		2	75	2		4	75	4			4	75	6		3	75	3		3	75	11
		0.44	75	20		1	75	12		4	75	11		4	75	6		8	75	7			8	75	18		6	75	6		6	75	23
		0.88	75	55		2	75	24		8	75	30		8	75	13		16	75	12			16	75	32		12	75	16		12	75	40
		1.75	75	68		4	75	45		16	75	44		16	75	31		32	75	22			32	75	52		24	75	25		24	75	57
		3.5	75	72		8	75	65		32	75	54		32	75	52		64	75	44			64	75	58		48	75	45		48	75	66
		7	75	75		16	75	70		64	75	65		0	75	1		128	75	52			0	75	1		96	75	53		96	75	72
		0	75	0		0	75	2		0	75	2						0	75	1							192	75	60		192	75	75
																											0	75	2		0	75	2
		Fipronil
		0.25	75	20		1.5	75	8						15.5	75	10		7.75	75	1			7.75	75	5		7.75	75	11
		0.5	75	28		3	75	12		31.25	75	2		31.25	75	15		15.5	75	4			15.5	75	8		15.5	75	14
		1	75	58		6	75	28		62.5	75	3		62.5	75	34		31.25	75	6			31.25	75	15		31.25	75	31
		2	75	69		12	75	45		125	75	12		125	75	50		62.5	75	20			62.5	75	33		62.5	75	48
		4	75	73		24	75	57		250	75	21		250	75	65		125	75	49			125	75	55		125	75	59
		8	75	75		48	75	70		500	75	45		0	75	1		250	75	60			250	75	70		250	75	72
		0	75	0		0	75	1		0	75	1						0	75	2			0	75	1		0	75	1
		monomehypo																					15.63	75	2		15.63	75	1		15.63	75	5
		0.25	75	21		1.5	75	6		31.25	75	5		31.25	75	7		31.25	75	3			31.25	75	5		31.25	75	3		31.25	75	8
		0.5	75	50		3	75	9		62.5	75	12		62.5	75	18		62.5	75	8			62.5	75	13		62.5	75	10		62.5	75	18
		1	75	64		7.5	75	20		125	75	24		125	75	34		125	75	20			125	75	40		125	75	21		125	75	40
		2	75	70		15	75	46		250	75	60		250	75	65		250	75	44			250	75	60		250	75	44		250	75	54
		4	75	74		30	75	54		500	75	73		500	75	74		500	75	70			500	75	72		500	75	64		500	75	64
		0	75	1		60	75	67		0	75	1		0	75	1		0	75	2			0	75	2		0	75	3		0	75	3
						0	75	1

## Sheet: Sheet2
																										MRG
			larvl duration						pupal duration				developmental time		survival				pupal weight	fecundity	percent hatching					1st instar larval weight 10 larvae	pupal wt
		Lab						Lab						larval survival	Adult eclosed		%larval survival	Female					Ro	rm	bp																				Biotic potential
	1	4	4.5	5		4.5		3.5			3.5		8	25	24	80	83.3333		18	452	46	92	332.672	0.725895	0.331892	0.039	18	4.5	1.36324			MRG	SE	Ro	DT	rm			se ro				bp			DT	fc
	2	3.5	4	5		4.16667		4			4		8.16667	26	23	76.6667	86.6667		18	440	49	98	330.587	0.71031	0.323688	0.039	16.3	4.5	1.34119		RYK	1.35	0.01	314.96	11.32	0.67	RYK	314.96	35.6	RYK	0.67	0.03	0.31	0.016	Buffalo	11.32	400	0.229864
	3	4.5	4	5		4.5		4			3.5		8	30	29	96.6667	100		17.4	460	45	90	400.2	0.748996	0.332845	0.038	17.4	4.5	1.36148		BWP	1.36	0.03	288.19	11.01	0.61	BWP	288.19	16.25	BWP	0.61	0.04	0.28	0.019	Cow	11.01	385	0.234828
	4	4	5	4		4.33333		4			4		8.33333	28	27	90	93.3333		18	445	43	86	344.43	0.701027	0.317803	0.039	16.7	4.5	1.34658		MTN	1.01	0.02	271.06	10.38	0.58	MTN	271.06	23	MTN	0.58	0.04	0.27	0.022	Dog	10.38	412	0.251917
	5	4.5	4	4		4.16667		4			4		8.16667	28	22	73.3333	93.3333		16.9	450	48	96	316.8	0.705094	0.324883	0.041	16.9	4.5	1.33811		LHR	0.82	0.12	172.51	12	0.44	LHR	193.85	15.87	LHR	0.46	0.039	0.22	0.017	Goat	12	360	0.213025
	6	4	4	5		4.33333		5			5		9.33333	28	26	86.6667	93.3333		18	445	42	84	323.96	0.619352	0.283753				1.35012		GJT	1.03	0.01	193.85	13.45	0.46	GJT	172.51	30	GJT	0.44	0.039	0.22	0.016	Horse	13.45	307	0.184917
	7	4	4	4		4		4			4		8	27	26	86.6667	90		20	460	44	88	350.827	0.732537	0.332845				0.0103682		RWP	0.9	0.04	132.07	9.27	0.36	RWP	132.07	19.9	RWP	0.36	0.037	0.18	0.017	poultry	9.27	443	0.28548
	8	3.5	4	5		4.16667		4			4		8.16667	27	25	83.3333	90		16.4	453	40	80	302	0.699236	0.325237																				Nursing Calf	10.02	435	0.263322
	9	4	3	4		3.66667		4			4		7.66667	28	24	80	93.3333		16.9	460	44	88	323.84	0.753946	0.347316			#REF!																	Sheep	12.68	362	0.201791
	10	4	4.5	4.5		4.33333		4			4		8.33333	27	26	86.6667	90		18	435	44	88	331.76	0.696529	0.316619															GJT	0.44
						0.249072					0.408248		0.437798			6.8132	4.49966		0.986802	8.74325		5.35413	26.4313	0.0377513	0.0165883
		Gujranwala						Gujranwala															0							Buffalo	0.957738
	1	5.5	4	5.5		5		4.5			4.5		9.5	26	23	76.6667	86.6667		16.5	398	41	82	250.209	0.581295	0.273672	0.041	16.5	4.5	1.33279	Cow	1.01813													correlatio
	2	5	4.5	5		4.83333		5			5		9.83333	27	25	83.3333	90		17	390	39	78	253.5	0.562918	0.263498	0.034	18	4.5	1.39373	Dog	1.06129													ro	bp	mrg
	3	5	6	5		5.33333		6			6		11.3333	26	23	76.6667	86.6667		16	375	43	86	247.25	0.486212	0.22712	0.041	16	4.5	1.32595	Goat	0.913													0.55	0.29	1.46285
	4	6	5	6		5.66667		5			7		12.6667	26	24	80	86.6667		16	400	35	70	224	0.427235	0.205426	0.035	16	4.5	1.36111	Horse	0.838965													0.49	0.26	1.20278
	5	5	5.5	5		5.16667		4			4		9.16667	25	23	76.6667	83.3333		16.6	398	38	76	231.901	0.594143	0.283624	0.036	16.6	4.5	1.36303	poultry	1.46285													0.46	0.25	1.06129
	6	6	5.5	6		5.83333		4.5			4.5		10.3333	26	24	80	86.6667		16.5	380	43	86	261.44	0.538665	0.249656				1.35532	Nursing Calf	1.20278													0.4	0.23	1.01813
	7	5.5	6	6.5		6		4			6		12	27	24	80	90		16.3	375	42	84	252	0.460786	0.214503				0.0242419	Sheep	0.770578													0.3	0.18	0.838965
	8	4	5	6		5		4.5			4.5		9.5	25	24	80	83.3333		17.5	395	39	78	246.48	0.579714	0.273326																			0.39	0.23	1.46285
	9	5.5	6	6.5		6		4			4		10	26	22	73.3333	86.6667		18	390	42	84	240.24	0.548164	0.259106																			0.33	0.2	0.770578
	10	3.5	4.5	5		4.33333		4.5			4.5		8.83333	24	20	66.6667	80		16.3	385	42	84	215.6	0.608312	0.292694																			0.34	0.21	0.913
						0.552492					1		1.27282			4.66137	3.06312		0.649872	9.47746		5.18116	14.3393	0.0608663	0.0296493
																							0
		Jhang																					0
								Jhang															0
	1	4.5	5	5.5		5		4			4		9	25	20	66.6667	83.3333		15.5	390	40	80	208	0.59306	0.287896	0.034	15.5	6	1.02037
	2	4	4.5	5		4.5		4			4		8.5	27	24	80	90		15.9	385	38	76	234.08	0.641843	0.304172	0.04	15.9	6	0.997532
	3	6	5	5		5.33333		4.5			4.5		9.83333	24	23	76.6667	80		15.8	400	39	78	239.2	0.557014	0.264616	0.04	15.8	6	0.996481
	4	5	5.5	6		5.5		5			5		10.5	25	25	83.3333	83.3333		17	390	45	90	292.5	0.540806	0.246768	0.032	18	6	1.0554
	5	6	6.5	5		5.83333		5			5		10.8333	25	24	80	83.3333		16	400	42	84	268.8	0.516366	0.24019	0.04	16	6	0.998577
	6	5	5.5	6		5.5		4.5			4.5		10	24	24	80	80		16	411	39	78	256.464	0.554699	0.261384				1.01367
	7	6	5.5	5		5.5		4.5			4.5		10	22	20	66.6667	73.3333		17.5	393	40	80	209.6	0.53452	0.259439				0.022671
	8	5.5	6	6.5		6		4.5			4.5		10.5	25	23	76.6667	83.3333		16.5	390	39	78	233.22	0.519236	0.246768
	9	4	5	6		5		5			5		10	27	23	76.6667	90		18	390	44	88	263.12	0.557261	0.259106
	10	5.5	6	6.5		6		4			4		10	28	24	80	93.3333		18	410	44	88	288.64	0.566518	0.261278
						0.479519					0.408248		0.699427			5.66558	5.8373		0.940213	8.98703		5.07718	29.6468	0.0371581	0.0194306
													0										0
		sargodha						sargodha					0										0
	1	5	6	6.5		5.83333		7			7		12.8333	21	18	60	70		11.2	380	37	74	168.72	0.399603	0.201022	0.03	11.2	6	0.987079
	2	5	7	6	6.5	6.125		5.5			5.5		11.625	22	19	63.3333	73.3333		13	380	31	62	149.213	0.43057	0.221917	0.024	13	6	1.04911
	3	5.5	7	5		5.83333		6			6		11.8333	22	20	66.6667	73.3333		11.3	370	30	60	148	0.4223	0.217031	0.024	11.3	6.5	0.946847
	4	6	7	7		6.66667		6			6		12.6667	23	22	73.3333	76.6667		13	380	28	56	156.053	0.3987	0.203667	0.025	13	5	1.25077
	5	6	7	6		6.33333		7			7		13.3333	23	20	66.6667	76.6667		11.8	372	32	64	158.72	0.380036	0.192791	0.03	11.8	6.5	0.919178
	6	4.5	7	6		5.83333		6			7		12.8333	25	22	73.3333	83.3333		11.5	383	40	80	224.693	0.421928	0.201288				1.0306
	7	4	7	6.5		5.83333		6			7		12.8333	23	19	63.3333	76.6667		13	385	35	70	170.683	0.400505	0.201464				0.118439
	8	5	5.5	5		5.16667		5			7		12.1667	22	21	70	73.3333		11.8	385	36	72	194.04	0.432992	0.212504
	9	5.5	6	6		5.83333		6			6		11.8333	19	16	53.3333	63.3333		13	385	32	64	26.1764	0.0187602	0.00973295
	10	5	6	7		6		7			7		13	23	21	70	76.6667		12	390	33	66	180.18
						0.390893					0.598609		0.584143			6.24599	5.2234		0.760409	6.12826		7.19259
		shekhupura						shekhupura															0
	1	7	6	7		6.66667		5			5		11.6667	24	20	66.6667	80		14.8	380	40	80	202.667	0.455277	0.221124	0.035	14.8	7.5	0.806271
	2	7	5	6.5		6.16667		6			6		12.1667	23	20	66.6667	76.6667		14.7	380	38	76	192.533	0.432351	0.212037	0.029	14.7	7.5	0.830441
	3	7	6	6.5		6.5		6			6		12.5	23	19	63.3333	76.6667		12	390	44	88	217.36	0.430524	0.207285	0.03	15	7.5	0.828614
	4	6	6.5	6.5		6.33333		6			6		12.3333	20	18	60	66.6667		14	370	33	66	146.52	0.404364	0.208233	0.035	14	7.5	0.798862
	5	7	6	6.5		6.5		6			6		12.5	23	20	66.6667	76.6667		15.3	390	41	82	213.2	0.428978	0.207285	0.03	15.3	7.5	0.831255
	6	5	5.5	6		5.5		5			5		10.5	22	20	66.6667	73.3333		15.5	390	38	76	197.6	0.503452	0.246768				0.819089
	7	7	6	7.5		6.83333		7			7		13.8333	24	21	70	80		14.9	380	28	56	148.96	0.361712	0.18649				0.0137188
	8	7	5.5	7		6.5		6			6		12.5	21	20	66.6667	70		13	390	42	84	218.4	0.430906	0.207285
	9	5.5	6	6		5.83333		7			7		12.8333	23	22	73.3333	76.6667		15.6	372	31	62	169.136	0.399795	0.200302
	10	5.5	6.5	7.5		6.5		5			5		11.5	24	20	66.6667	80		14	365	42	84	204.4	0.462616	0.222808
						0.400617					0.737865		0.882617			3.51364	4.45831		1.15451	9.33393		10.627	26.9234	0.0384829	0.0159072
		sialkot						sialkot					0										0									bp	error
	1	7	6.5	7		6.83333		7			7		13.8333	19	16	53.3333	63.3333		11.2	380	32	64	129.707	0.351707	0.18649	0.025	11.2	7	0.872113		RYK	0.31	0.016
	2	6.5	7.5	8		7.33333		7			7		14.3333	20	18	60	66.6667		14	390	28	56	131.04	0.340151	0.180772	0.025	14	6.7	0.944468		BWP	0.28	0.019
	3	7	8	8		7.66667		6			8		15.6667	21	20	66.6667	70		11.3	390	28	56	145.6	0.317927	0.165387	0.026	11.3	7.2	0.843675		MTN	0.27	0.022
	4	7.5	8	8.5		8		6			6		14	23	20	66.6667	76.6667		12	370	32	64	157.867	0.361554	0.183443	0.025	13	6.7	0.933407		LHR	0.22	0.017
	5	7	8.5	9		8.16667		7			7		15.1667	22	21	70	73.3333		11.8	390	30	60	163.8	0.336174	0.170839	0.028	11.8	6.7	0.902037		GJT	0.22	0.016
	6	6.5	7	7		6.83333		6			6		12.8333	24	23	76.6667	80		13	390	32	64	191.36	0.409415	0.201901				0.89914		RWP	0.18	0.017
	7	8	8	8.5		8.16667		6			6		14.1667	22	21	70	73.3333		13	380	28	56	148.96	0.353201	0.182102				0.0375342
	8	8	6.5	7.5		7.33333		7			8		15.3333	23	22	73.3333	76.6667		13	390	32	64	183.04	0.339763	0.168982
	9	8	8.5	7		7.83333		7			8		15.8333	25	23	76.6667	83.3333		12.5	380	28	56	163.147	0.321767	0.162934						GJT	0.22
	10	7	9	9.5		8.5		7			7		15.5	23	20	66.6667	76.6667		14	400	33	66	176	0.33358	0.167875
						0.353117					0.816497		0.978156			7.23503	6.0451		1.00311	8.43274		4.22164	20.752	0.0259149	0.012065
																														mean relative growth rate
																														trt	rep	mrg
																														1	1	1.36324
																														1	2	1.34119
																														1	3	1.36148
																														1	4	1.34658
																														1	5	1.33811
																														2	1	1.33279
																														2	2	1.39373
																														2	3	1.32595
																														2	4	1.36111
																														2	5	1.36303
																														3	1	1.02037
																														3	2	0.997532
																														3	3	0.996481
																														3	4	1.0554
																														3	5	0.998577
																														4	1	0.987079
																														4	2	1.04911
																														4	3	0.946847
																														4	4	1.25077
																														4	5	0.919178
																														5	1	0.806271
																														5	2	0.830441
																														5	3	0.828614
																														5	4	0.798862
																														5	5	0.831255
																														6	1	0.872113
																														6	2	0.944468
																														6	3	0.843675
																														6	4	0.933407
																														6	5	0.902037

## Sheet: Aedes fitness
	2 Experiments with 3 replicates per exp. 50 larvae per replicate. 20-25 females were taken from each experiment and them to mate. Engorged females transferred to petri plates
			strain	larvae	pupae formed		male	female	ratio	male survival	%	female survival	%		rate of egg laying means percentage of blood females that laid eggs
1	REF		1	50	48	96	24	24	1	16	66.6667	19	79.1667	strain	femles	Rate egglaying		eggs/female/seven days
2	LHR		1	50	42	84	20	22	0.909091	15	75	17	77.2727	1	20	20	100	1700	85
3	OKR		1	50	40	80	20	20	1	17	85	17	85	1	20	20	100	1750	87.5
4	GJR		1	50	49	98	25	24	1.04167	17	68	18	75	1	20	20	100	1600	80
5	MBD		1	50	47	94	24	23	1.04348	15	62.5	15	65.2174	1	20	20	100	1680	84
6	KSB		1	50	46	92	22	24	0.916667	15	68.1818	16	66.6667	1	20	20	100	1693	84.65
7	MTN		2	50	45	90	23	22	1.04545	16	69.5652	17	77.2727	1	20	20	100	1581	79.05
8	JHG		2	50	43	86	21	22	0.954545	15	71.4286	17	77.2727	2	20	18	90	1400	77.7778
			2	50	37	74	18	19	0.947368	11	61.1111	15	78.9474	2	20	19	95	1470	77.3684
			2	50	40	80	20	20	1	13	65	14	70	2	20	20	100	1405	70.25
			2	50	45	90	23	22	1.04545	13	56.5217	14	63.6364	2	20	17	85	1352	79.5294
			2	50	47	94	21	26	0.807692	13	61.9048	14	53.8462	2	20	17	85	1203	70.7647
			3	50	30	60	16	14	1.14286	8	50	11	78.5714	2	20	20	100	1410	70.5
			3	50	24	48	11	13	0.846154	6	54.5455	7	53.8462	3	20	12	60	850	70.8333
			3	50	20	40	9	11	0.818182	5	55.5556	6	54.5455	3	20	15	75	937	62.4667
			3	50	26	52	13	13	1	5	38.4615	7	53.8462	3	20	15	75	1000	66.6667
			3	50	28	56	13	15	0.866667	7	53.8462	8	53.3333	3	20	13	65	911	70.0769
			3	50	28	56	14	14	1	8	57.1429	8	57.1429	3	20	16	80	998	62.375
			4	50	35	70	17	18	0.944444	8	47.0588	9	50	3	20	13	65	998	76.7692
			4	50	33	66	18	15	1.2	10	55.5556	11	73.3333	4	20	16	80	1100	68.75
			4	50	26	52	13	13	1	6	46.1538	7	53.8462	4	20	16	80	1137	71.0625
			4	50	26	52	14	12	1.16667	6	42.8571	7	58.3333	4	20	15	75	1120	74.6667
			4	50	30	60	14	16	0.875	6	42.8571	8	50	4	20	13	65	850	65.3846
			4	50	30	60	14	16	0.875	7	50	8	50	4	20	13	65	895	68.8462
			5	50	25	50	13	12	1.08333	5	38.4615	7	58.3333	4	20	12	60	828	69
			5	50	30	60	15	15	1	7	46.6667	6	40	5	20	12	60	825	68.75
			5	50	22	44	11	11	1	6	54.5455	6	54.5455	5	20	16	80	1096	68.5
			5	50	22	44	10	12	0.833333	5	50	7	58.3333	5	20	16	80	1100	68.75
			5	50	24	48	13	11	1.18182	6	46.1538	7	63.6364	5	20	12	60	850	70.8333
			5	50	30	60	14	16	0.875	7	50	8	50	5	20	12	60	776	64.6667
			6	50	34	68	18	16	1.125	8	44.4444	9	56.25	5	20	12	60	799	66.5833
			6	50	34	68	17	17	1	8	47.0588	8	47.0588	6	20	10	50	682	68.2
			6	50	27	54	13	14	0.928571	7	53.8462	8	57.1429	6	20	15	75	882	58.8
			6	50	27	54	14	13	1.07692	5	35.7143	7	53.8462	6	20	11	55	820	74.5455
			6	50	26	52	14	12	1.16667	6	42.8571	7	58.3333	6	20	11	55	800	72.7273
			6	50	28	56	12	16	0.75	5	41.6667	8	50	6	20	12	60	800	66.6667
			7	50	25	50	12	13	0.923077	5	41.6667	7	53.8462	6	20	12	60	800	66.6667
			7	50	30	60	15	15	1	9	60	10	66.6667	7	20	13	65	750	57.6923
			7	50	30	60	15	15	1	8	53.3333	9	60	7	20	10	50	700	70
			7	50	25	50	13	12	1.08333	6	46.1538	9	75	7	20	10	50	723	72.3
			7	50	25	50	12	13	0.923077	5	41.6667	6	46.1538	7	20	15	75	945	63
			7	50	25	50	13	12	1.08333	6	46.1538	6	50	7	20	12	60	800	66.6667
			8	50	20	40	8	12	0.666667	4	50	5	41.6667	7	20	12	60	827	68.9167
			8	50	22	44	11	11	1	5	45.4545	5	45.4545	8	20	11	55	800	72.7273
			8	50	25	50	14	11	1.27273	6	42.8571	6	54.5455	8	20	11	55	800	72.7273
			8	50	27	54	13	14	0.928571	6	46.1538	7	50	8	20	11	55	750	68.1818
			8	50	27	54	12	15	0.8	5	41.6667	8	53.3333	8	20	14	70	800	57.1429
			8	50	25	50	13	12	1.08333	5	38.4615	6	50	8	20	15	75	806	53.7333
											#DIV/0!		#DIV/0!	8	20	12	60	814	67.8333
				Pupal formation	sd	male survival	sd	female surv	sd	rate egglaying	sd	fecundity	sd	sex ratio	sd
		1	REF	90.67	7	70.89	8	74.72	7.6	100	0	83.37	3.2	0.99	0.06
		2	LHR	85.67	7.42	64.25	5.57	70.16	9.9	92.5	6.89	74.37	4.3	0.98	0.09
		3	OKR	52	7.15	51.59	6.86	58.59	9.9	70	7.74	68.2	5.53	0.98	0.12
		4	GJR	60	7.26	47.41	4.82	55.92	9.1	70.83	8.61	69.62	3.07	1.01	0.14
		5	MBD	51	7.34	47.64	5.41	54.14	8.27	66.66	10.33	68.01	2.12	1	0.13
		6	KSB	58.67	7.33	44.27	6.02	53.7	4.42	59.17	8.6	67.93	5.54	1.01	0.15
		7	MTN	53.33	5.16	48.16	7.2	58.6	10.83	60	9.49	66.43	5.32	1	0.07
		8	JHG	48.67	5.6	44.1	4	49.17	4.85	61.67	8.76	65.39	8.07	0.98	0.21
